# Supplementary material for: FAP Targeting of Photosensitizer-Loaded Polymersomes for Increased Light-Activated Cell Killing
Source: PubMed Central journal article supplement — Biomacromolecules. 2024 Jan 24;25(2):754–66. doi: 10.1021/acs.biomac.3c00943 (PMC10865352; doi:10.1021/acs.biomac.3c00943), 2024-01-24
Supplement: bm3c00943_si_001.pdf [file bm3c00943_si_001.pdf]

# Supporting Information

## FAP Targeting of Photosensitizer-Loaded Polymersomes for Increased Light-Activated Cell Killing

Michal Skowicki<sup>1,2,‡</sup>, Dimitri Hürlimann<sup>1,2,‡</sup>, Shabnam Tarvirdipour<sup>1</sup>, Myrto Kyropoulou<sup>1,2</sup>, Cora-Ann Schoenenberger<sup>1,2</sup>, Sandrine Gerber-Lemaire<sup>3</sup>, Cornelia G. Palivan<sup>1,2\*</sup>

<sup>1</sup> Department of Chemistry, University of Basel, BPR 1096, Mattenstrasse 24a, 4058 Basel, Switzerland,

<sup>2</sup> NCCR-Molecular Systems Engineering, BPR 1095, Mattenstrasse 24a, 4058 Basel, Switzerland,

<sup>3</sup> Group for Functionalized Biomaterials, Institute of Chemical Sciences and Engineering, Ecole Polytechnique Fédérale de Lausanne, CH-1015 Lausanne, Switzerland.

‡ These authors contributed equally to this work.

\* Corresponding author. E-mail address: [cornelia.palivan@unibas.ch](mailto:cornelia.palivan@unibas.ch)

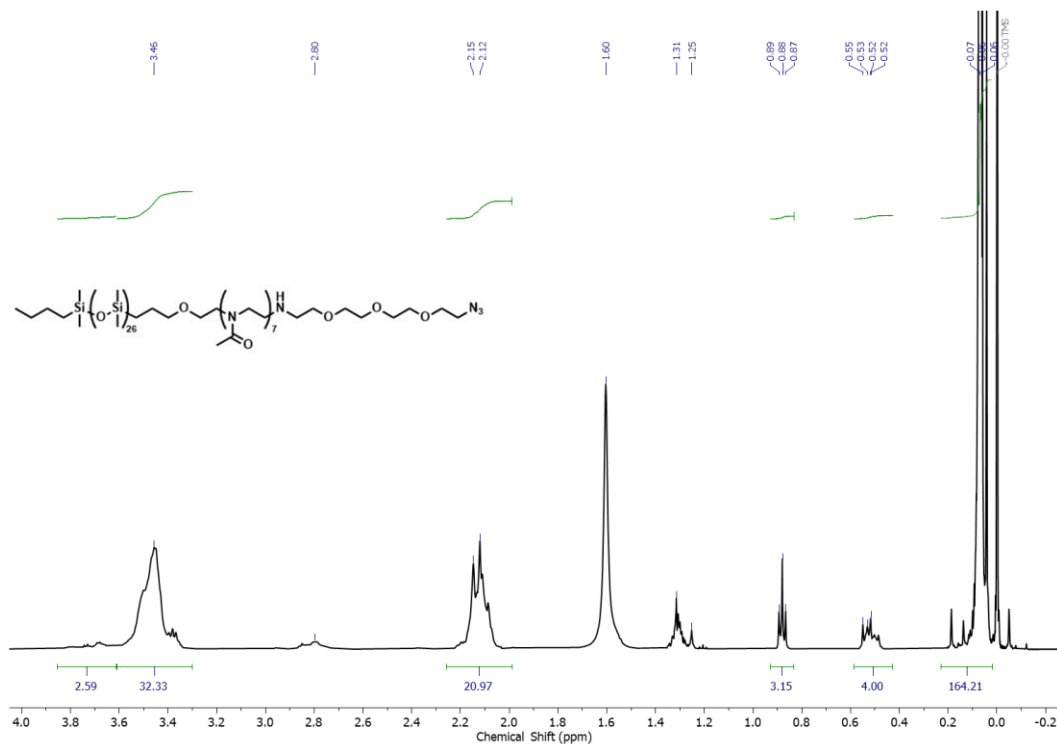

Figure S1. <sup>1</sup>H NMR of PDMS<sub>27</sub>-PMOXA<sub>7</sub>-PEG<sub>3</sub>-N<sub>3</sub>

Table S1. Determination of the size and concentration of polymersomes by nanoparticle tracking analysis (NTA). Samples were diluted 1:4000 – 1:2000 in PBS prior measurements. The obtained results were multiplied by the dilution factor.

|                  | <b>Concentration (NPs/mL)</b>               | <b>Hydrodynamic radius <math>R_h</math> (nm)</b> |
|------------------|---------------------------------------------|--------------------------------------------------|
| Pol-Atto633      | $2.0 \times 10^{12} \pm 3.5 \times 10^{10}$ | $55 \pm 3$                                       |
| FAPi-Pol-Atto633 | $7.0 \times 10^{11} \pm 1.2 \times 10^{10}$ | $58 \pm 5$                                       |
| Pol-RB           | $9.1 \times 10^{11} \pm 2.0 \times 10^{10}$ | $54 \pm 4$                                       |
| FAPi-pol-RB      | $9.2 \times 10^{10} \pm 2.8 \times 10^9$    | $58 \pm 7$                                       |

Table S2. Determination of the size of polymersomes by dynamic light scattering (DLS) measured at fixed angle (angle of  $173^\circ$ ) and Zeta-potential measurements.

|                  | <b><math>R_h</math> (nm)</b> | <b>Zeta potential (mV)</b> |
|------------------|------------------------------|----------------------------|
| Pol-Atto633      | $68 \pm 5$                   | $-4.0 \pm 0.5$ mV          |
| FAPi-Pol-Atto633 | $73 \pm 7$                   | $-6.2 \pm 0.5$ mV          |

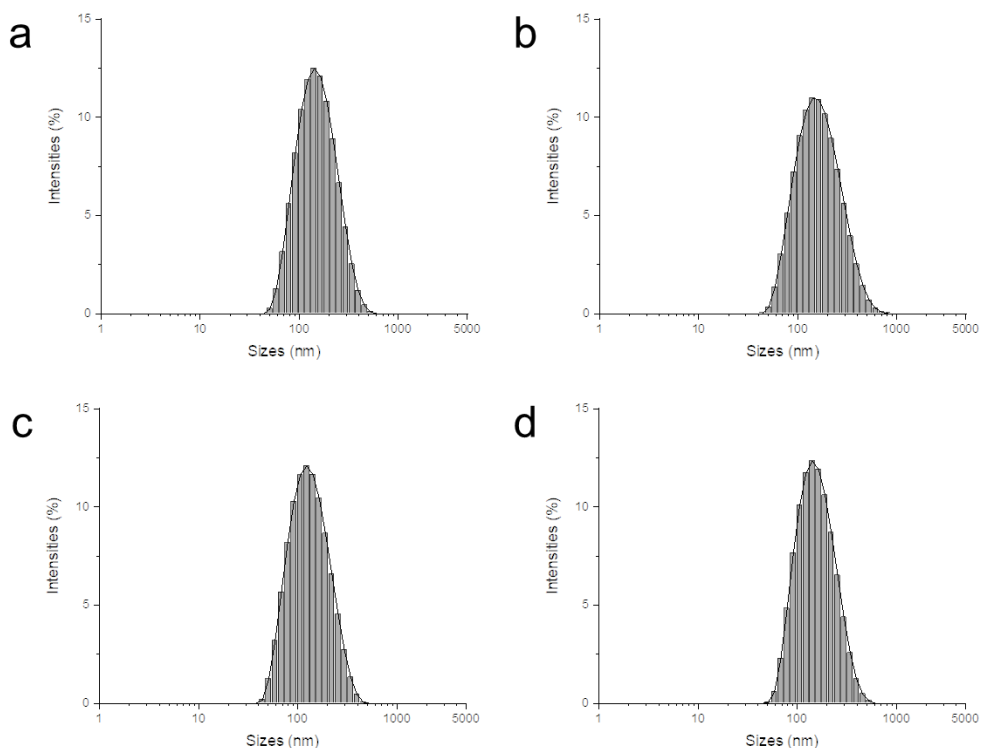

Figure S2. Polymersome size distribution measured by DLS at fixed angle (angle of  $173^\circ$ ). (a) Pol-Atto633, (b) FAPi-Pol-Atto633, (c) Pol-RB, (d) FAPi-Pol-RB. Samples were diluted 1:500 – 1:1000 in PBS prior measurements.

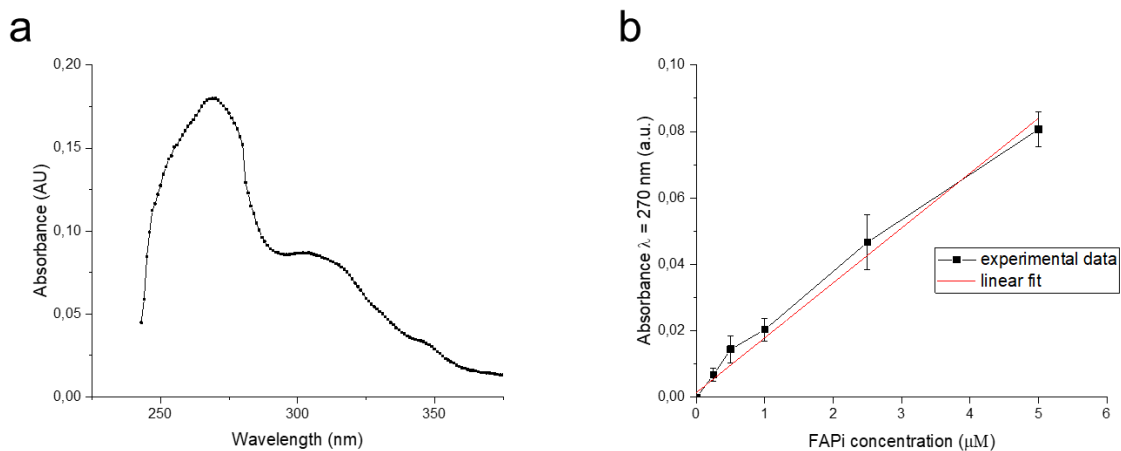

Figure S3. UV absorbance spectra of DIBO-PEG<sub>3</sub>-FAPi. (a) Absorbance spectrum of 8  $\mu\text{M}$  DIBO-PEG<sub>3</sub>-FAPi in PBS containing 2% DMF. Absorbance spectrum has been recorded at range of  $\lambda = 243 \text{ nm} - 375 \text{ nm}$  and the background absorbance of the solution (2% DMF in PBS) has been subtracted. (b) linear calibration curve of absorbance ( $\lambda = 270 \text{ nm}$ ) vs. concentration of DIBO-PEG<sub>3</sub>-FAPi (0.25 – 5  $\mu\text{M}$ ).

Table S3. Determination of the size of polymersomes by DLS measured at scattering angles from 20° to 150°.

|             | $R_h$      | $R_g$         | $R_g/R_h$ |
|-------------|------------|---------------|-----------|
| Pol-RB      | $60 \pm 2$ | $62 \pm 3$ nm | 1.03      |
| FAPi-pol-RB | $67 \pm 4$ | $69 \pm 4$ nm | 1.03      |

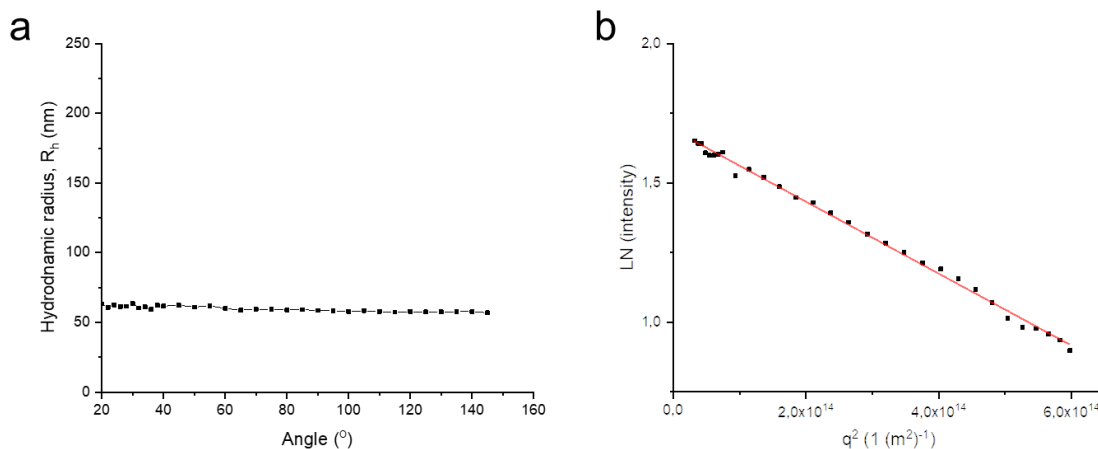

Figure S4. Static light scattering (SLS) measurement of RB-loaded polymersomes. (a) DLS profile showing the mean hydrodynamic radius,  $R_h$ ; (b) SLS data and linear fit to the Guinier equation.

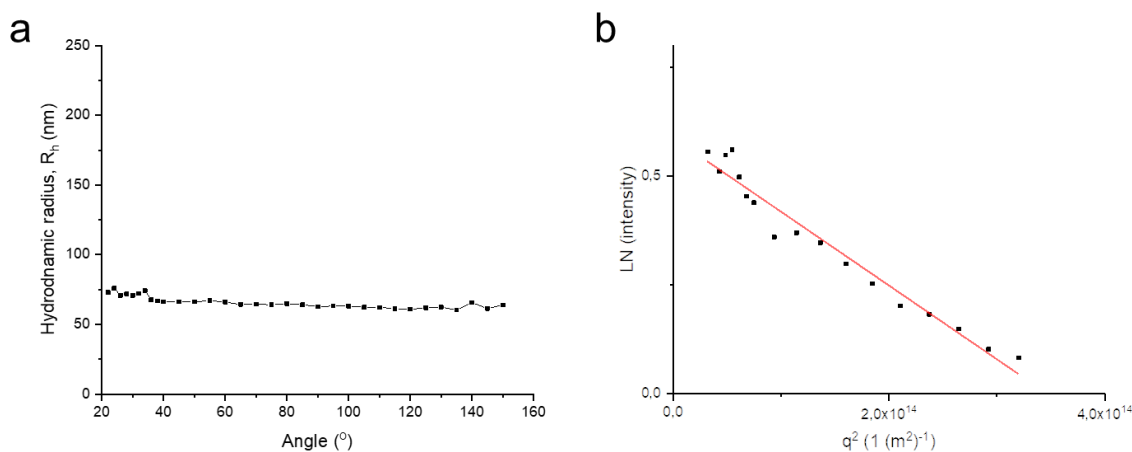

Figure S5. SLS measurement of RB-loaded FAPi-functionalized polymersomes. (a) DLS profile showing the mean hydrodynamic radius,  $R_h$ ; (b) SLS data and linear fit to the Guinier equation.

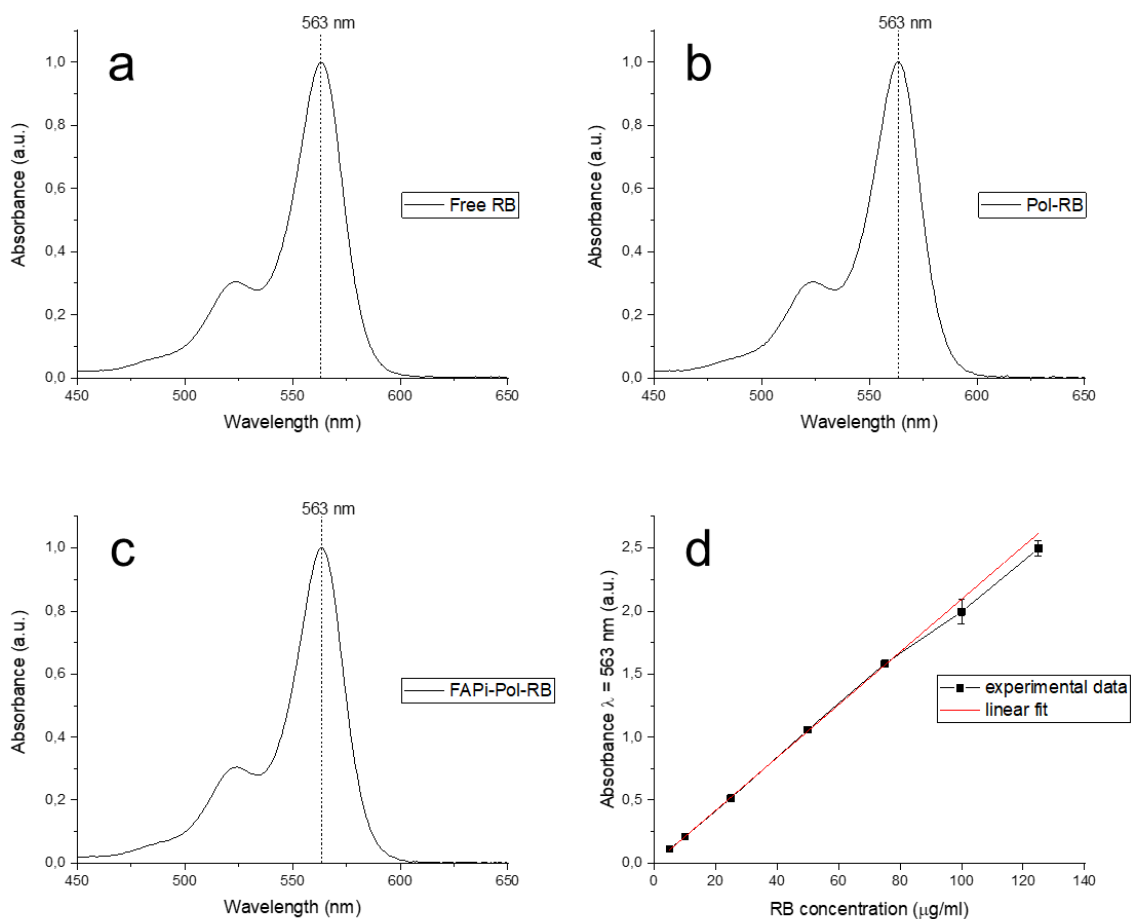

Figure S6. RB concentration measurement. Normalized absorbance spectra of samples containing: (a) free RB, (b) Pol-RB, (c) FAPI-Pol-RB after incubation at 95 °C for 15 min in the presence of 1% Triton X-100. (d) linear calibration curve of absorbance ( $\lambda = 563$  nm) vs. concentration of RB (5 – 125  $\mu\text{g/ml}$ ) after incubation at 95 °C for 15 min in the presence of 1% Triton X-100.

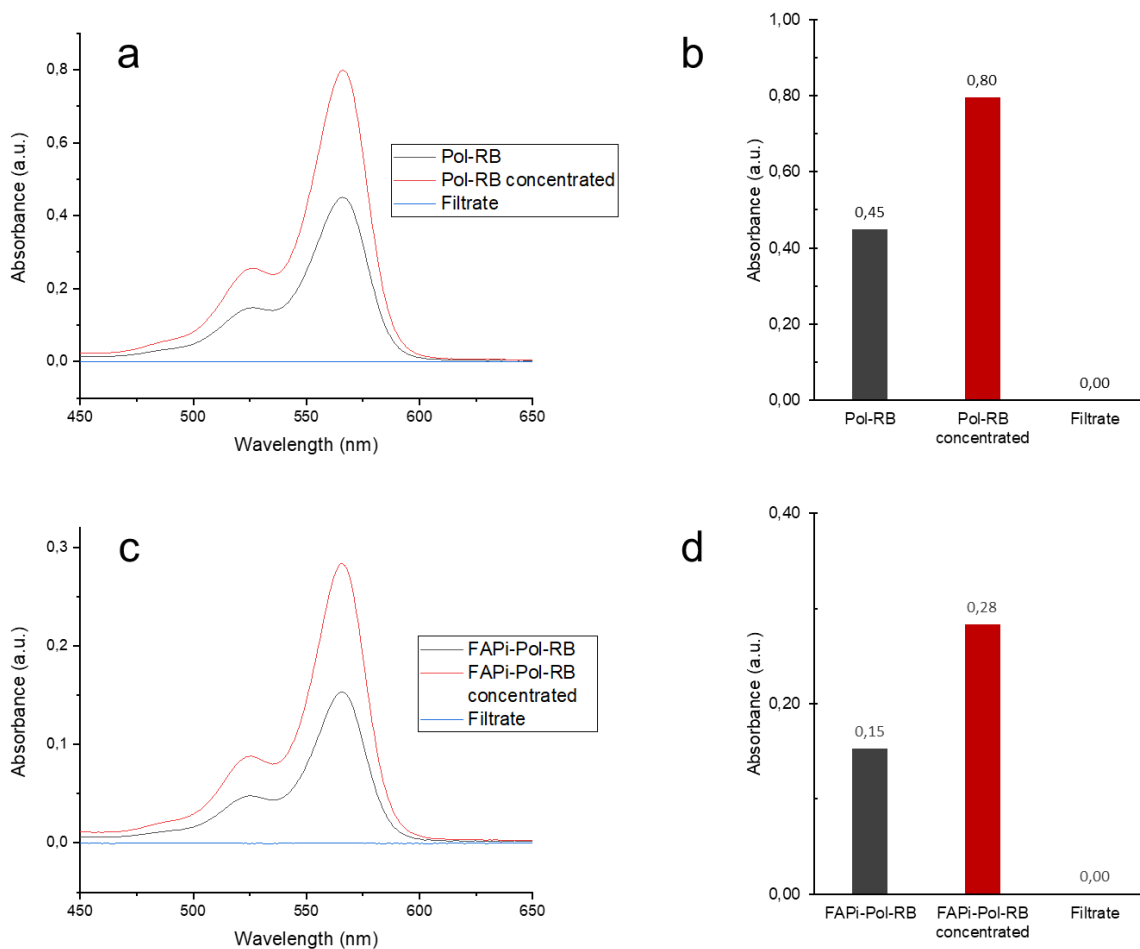

Figure S7. Stability measurement of RB-loaded polymersomes upon 4-month storage at 4 °C. PBS suspensions of: Pol-RB ( $\approx 20 \mu\text{g RB/ml}$ ) (a, b) and FAPi-Pol-RB ( $\approx 7.5 \mu\text{g RB/ml}$ ) (c, d) were filtered through centrifugal regenerated cellulose filters of 3000 Da MWCO. (a, c) absorbance spectra of input polymersome samples (black), polymersome concentrate (red) and filtrate (blue) for Pol-RB (a) and FAPi-Pol-RB (c). (b, d) histograms representing absorbance values of each sample of Pol-RB (b) and FAPi-Pol-RB (d) measured at the  $\lambda_{\text{max}}$  ( $\lambda = 565 \text{ nm}$  for polymersomes,  $\lambda = 549 \text{ nm}$  for free RB).

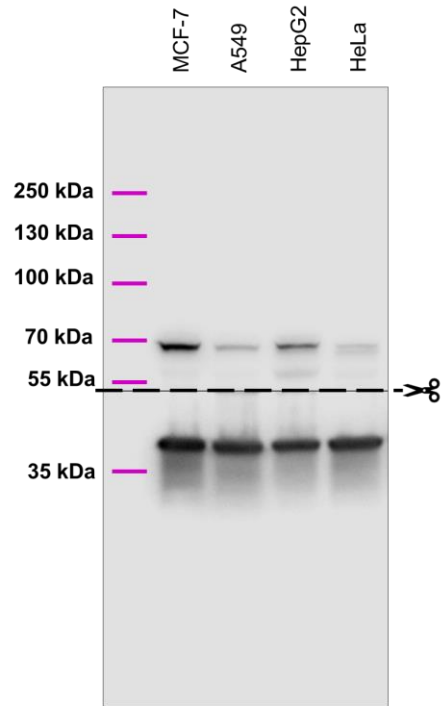

Figure S8. Comparison of FAP $\alpha$  expression between different cell lines. Western blot analysis of FAP protein expression in protein extracts from MCF-7, A549, HepG2 and HeLa cell lines (equivalent of 40  $\mu$ g of protein per lane). GAPDH was used as loading control.

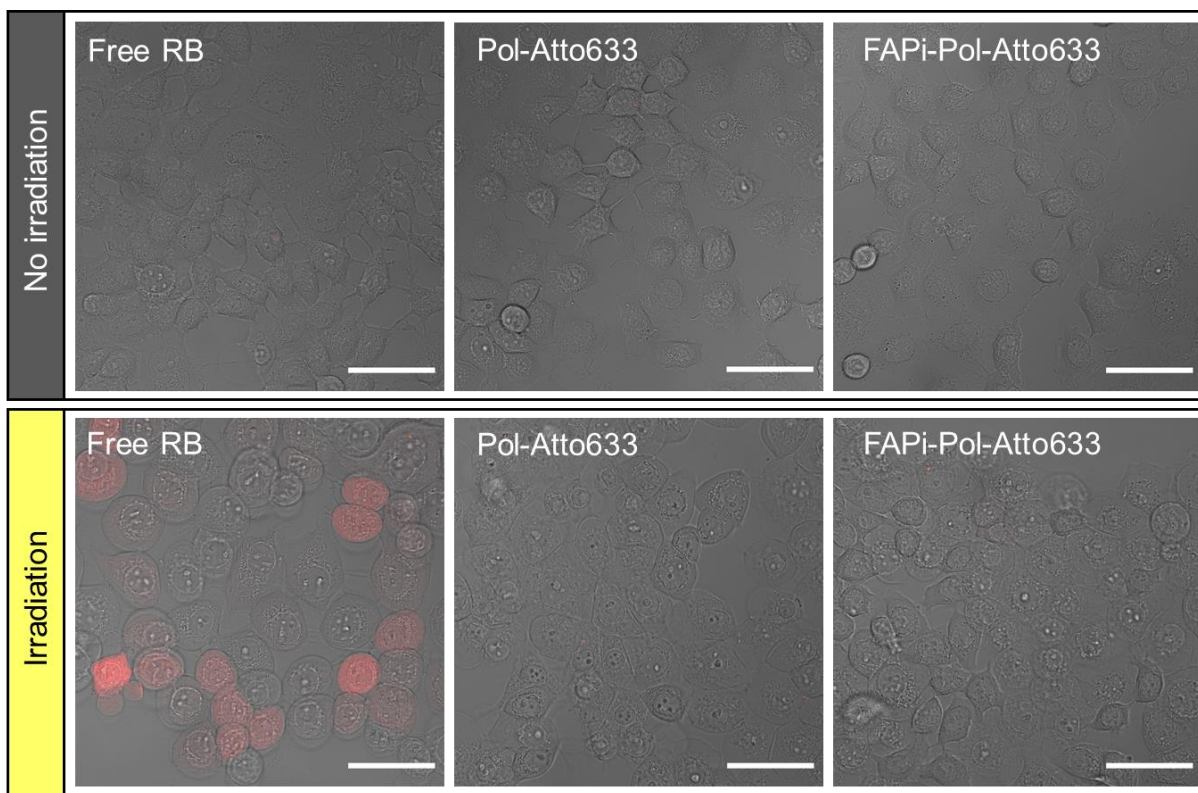

Figure S9. Reactive oxygen species detection. CLSM images of MCF-7 cells after 24 h incubation with free RB, Pol and FAPi-Pol samples with and without irradiation. Images show transmitted light channel merged with fluorescence of the ROS detection agent (DCF, red). Scale bars, 50  $\mu\text{m}$ .
